# Supplementary material for: Clinical epidemiology and high genetic diversity amongst Cryptococcus spp. isolates infecting people living with HIV in Kinshasa, Democratic Republic of Congo
Source: PubMed Central journal article supplement (PMC9119562; doi:10.1371/journal.pone.0267842), 2022-05-19

# PLOS ONE

## Clinical epidemiology and high genetic diversity amongst *Cryptococcus* spp. isolates infecting people living with HIV in Kinshasa, Democratic Republic of Congo --Manuscript Draft--

|                              |                                                                                                                                                                                                                                                                                                                                                                                                                                                                                                                                                                                                                                                                                                                                                                                                                                                                                                                                                                                                                                                                                                                                                                                                                                                                                                                                                                                                                                                                                                                                                                                                                                                                                                                                                                                                                                                                                                                                                                                                                                    |
|------------------------------|------------------------------------------------------------------------------------------------------------------------------------------------------------------------------------------------------------------------------------------------------------------------------------------------------------------------------------------------------------------------------------------------------------------------------------------------------------------------------------------------------------------------------------------------------------------------------------------------------------------------------------------------------------------------------------------------------------------------------------------------------------------------------------------------------------------------------------------------------------------------------------------------------------------------------------------------------------------------------------------------------------------------------------------------------------------------------------------------------------------------------------------------------------------------------------------------------------------------------------------------------------------------------------------------------------------------------------------------------------------------------------------------------------------------------------------------------------------------------------------------------------------------------------------------------------------------------------------------------------------------------------------------------------------------------------------------------------------------------------------------------------------------------------------------------------------------------------------------------------------------------------------------------------------------------------------------------------------------------------------------------------------------------------|
| <b>Manuscript Number:</b>    | PONE-D-21-40474                                                                                                                                                                                                                                                                                                                                                                                                                                                                                                                                                                                                                                                                                                                                                                                                                                                                                                                                                                                                                                                                                                                                                                                                                                                                                                                                                                                                                                                                                                                                                                                                                                                                                                                                                                                                                                                                                                                                                                                                                    |
| <b>Article Type:</b>         | Research Article                                                                                                                                                                                                                                                                                                                                                                                                                                                                                                                                                                                                                                                                                                                                                                                                                                                                                                                                                                                                                                                                                                                                                                                                                                                                                                                                                                                                                                                                                                                                                                                                                                                                                                                                                                                                                                                                                                                                                                                                                   |
| <b>Full Title:</b>           | Clinical epidemiology and high genetic diversity amongst <i>Cryptococcus</i> spp. isolates infecting people living with HIV in Kinshasa, Democratic Republic of Congo                                                                                                                                                                                                                                                                                                                                                                                                                                                                                                                                                                                                                                                                                                                                                                                                                                                                                                                                                                                                                                                                                                                                                                                                                                                                                                                                                                                                                                                                                                                                                                                                                                                                                                                                                                                                                                                              |
| <b>Short Title:</b>          | Clinical and molecular overview of cryptococcosis in PLHIV in Kinshasa, DRC                                                                                                                                                                                                                                                                                                                                                                                                                                                                                                                                                                                                                                                                                                                                                                                                                                                                                                                                                                                                                                                                                                                                                                                                                                                                                                                                                                                                                                                                                                                                                                                                                                                                                                                                                                                                                                                                                                                                                        |
| <b>Corresponding Author:</b> | BIVE BIVE ZONO, M.D<br>University of Kinshasa: Universite de Kinshasa<br>Kinshasa, Kinshasa CONGO, THE DEMOCRATIC REPUBLIC OF THE                                                                                                                                                                                                                                                                                                                                                                                                                                                                                                                                                                                                                                                                                                                                                                                                                                                                                                                                                                                                                                                                                                                                                                                                                                                                                                                                                                                                                                                                                                                                                                                                                                                                                                                                                                                                                                                                                                  |
| <b>Keywords:</b>             | <i>Cryptococcus</i> spp.; species diversity; ITS sequencing; MALDI-TOF MS; Multilocus sequence typing; people living with HIV; neuromeningeal cryptococcosis; Kinshasa; DRC                                                                                                                                                                                                                                                                                                                                                                                                                                                                                                                                                                                                                                                                                                                                                                                                                                                                                                                                                                                                                                                                                                                                                                                                                                                                                                                                                                                                                                                                                                                                                                                                                                                                                                                                                                                                                                                        |
| <b>Abstract:</b>             | <p>Neuromeningeal cryptococcosis (NMC) due to <i>Cryptococcus</i> spp. complex is one of the life-threatening opportunistic infections during HIV infection, mainly in sub-Saharan Africa. We focused on the molecular characterization of <i>Cryptococcus</i> isolates from people living with HIV (PLHIV) in Kinshasa (DRC) and investigated possible associations between NMC severity factors and the <i>Cryptococcus neoformans</i> (Cn) multilocus sequence typing (MLST) profiles. The isolates were characterized using PCR serotyping, MALDI-TOF MS, internal transcribed spacer (ITS) sequencing and MLST analysis. NMC severity factors, such as hypoglycorrhachia (&lt;50mg/dL), very raised cerebral spinal fluid opening pressure (&gt;30 cm water), and pejorative outcome in patients were compared with the Cn MLST sequences type (ST). Twenty-three out of 29 <i>Cryptococcus</i> isolates have been identified as serotype A using PCR (79.3%; 95% IC: 65.5-93.1), while six (20.7%; 95% IC: 6.9-34.5) were not serotypable. The 29 isolates have been identified by ITS sequencing as follows: <i>Cryptococcus neoformans</i> (23/29, 79.3%), <i>Cryptococcus curvatus</i> (5/29, 17.2%), and <i>Cryptococcus laurentii</i> (1/29, 3.5%). All Cn isolates were identified as molecular type VNI using the MLST ISHAM scheme, including seven different STs: ST93 (n=15), ST5 (n=2), ST53 (n=1), ST31 (n=1), ST4 (n=1), ST69 (n=1), and one novel ST identified in the present work and subsequently assigned as ST659 (n=2). Among NMC severity factors, only the patient pejorative outcome was associated with infections by less common STs isolates ( 7/8, 87.5%, p=0.02) (ST53, ST31, ST5, ST4, ST659, and ST69). Molecular analysis of <i>Cryptococcus</i> spp. isolates showed a wide species diversity and genetic heterogeneity of Cn within the VNI molecular type. Furthermore, infections due to less common STs were associated with more <b>pejorative</b> outcomes than those due to ST93.</p> |
| <b>Order of Authors:</b>     | <p>BIVE BIVE ZONO, M.D</p> <p>Rosalie SACHELI, PhD</p> <p>Alex KA, PhD</p> <p>Gaultier MUENDELE, M.D</p> <p>Raphaël BOREUX, Medical Biologist</p> <p>Nicole LANDU, M.D</p> <p>Pierre-Robert M'BUZE, M.D</p> <p>Michel MOUTSCHEN, Professor</p> <p>Wieland MEYER, Professor</p> <p>Marie-Pierre HAYETTE, Professor</p> <p>Hippolyte SITUAKIBANZA</p> <p>Marcel MBULA, M.D</p>                                                                                                                                                                                                                                                                                                                                                                                                                                                                                                                                                                                                                                                                                                                                                                                                                                                                                                                                                                                                                                                                                                                                                                                                                                                                                                                                                                                                                                                                                                                                                                                                                                                       |

|                                                                                                                                                                                                                                                                                                                                                                                                                                                                                                                                                                                                                                                                                                                                                                                                                                                                                                                                                                                                                                                                                                                                                                                                                                                                                                                                                                                     |                                                                                                                                                                                                                                             |
|-------------------------------------------------------------------------------------------------------------------------------------------------------------------------------------------------------------------------------------------------------------------------------------------------------------------------------------------------------------------------------------------------------------------------------------------------------------------------------------------------------------------------------------------------------------------------------------------------------------------------------------------------------------------------------------------------------------------------------------------------------------------------------------------------------------------------------------------------------------------------------------------------------------------------------------------------------------------------------------------------------------------------------------------------------------------------------------------------------------------------------------------------------------------------------------------------------------------------------------------------------------------------------------------------------------------------------------------------------------------------------------|---------------------------------------------------------------------------------------------------------------------------------------------------------------------------------------------------------------------------------------------|
|                                                                                                                                                                                                                                                                                                                                                                                                                                                                                                                                                                                                                                                                                                                                                                                                                                                                                                                                                                                                                                                                                                                                                                                                                                                                                                                                                                                     | Pius KABUTUTU, Professor                                                                                                                                                                                                                    |
|                                                                                                                                                                                                                                                                                                                                                                                                                                                                                                                                                                                                                                                                                                                                                                                                                                                                                                                                                                                                                                                                                                                                                                                                                                                                                                                                                                                     | Georges MVUMBI, Professor                                                                                                                                                                                                                   |
|                                                                                                                                                                                                                                                                                                                                                                                                                                                                                                                                                                                                                                                                                                                                                                                                                                                                                                                                                                                                                                                                                                                                                                                                                                                                                                                                                                                     | Celestin MUDOGO, PhD                                                                                                                                                                                                                        |
| <b>Additional Information:</b>                                                                                                                                                                                                                                                                                                                                                                                                                                                                                                                                                                                                                                                                                                                                                                                                                                                                                                                                                                                                                                                                                                                                                                                                                                                                                                                                                      |                                                                                                                                                                                                                                             |
| <b>Question</b>                                                                                                                                                                                                                                                                                                                                                                                                                                                                                                                                                                                                                                                                                                                                                                                                                                                                                                                                                                                                                                                                                                                                                                                                                                                                                                                                                                     | <b>Response</b>                                                                                                                                                                                                                             |
| <p><b>Financial Disclosure</b></p> <p>Enter a financial disclosure statement that describes the sources of funding for the work included in this submission. Review the <a href="#">submission guidelines</a> for detailed requirements. View published research articles from <a href="#">PLOS ONE</a> for specific examples.</p> <p>This statement is required for submission and <b>will appear in the published article</b> if the submission is accepted. Please make sure it is accurate.</p> <p><b>Unfunded studies</b><br/>Enter: <i>The author(s) received no specific funding for this work.</i></p> <p><b>Funded studies</b><br/>Enter a statement with the following details:</p> <ul style="list-style-type: none"> <li>• Initials of the authors who received each award</li> <li>• Grant numbers awarded to each author</li> <li>• The full name of each funder</li> <li>• URL of each funder website</li> <li>• Did the sponsors or funders play any role in the study design, data collection and analysis, decision to publish, or preparation of the manuscript?</li> <li>• <b>NO</b> - Include this sentence at the end of your statement: <i>The funders had no role in study design, data collection and analysis, decision to publish, or preparation of the manuscript.</i></li> <li>• <b>YES</b> - Specify the role(s) played.</li> </ul> <p>* typeset</p> | <p>The current study has been funded by Académie de Recherche et d'Enseignement Supérieur (ARES-Belgium). The funders had no role in study design, data collection and analysis, decision to publish, or preparation of the manuscript.</p> |
| <p><b>Competing Interests</b></p> <p>Use the instructions below to enter a competing interest statement for this submission. On behalf of all authors, disclose any <a href="#">competing interests</a> that could be perceived to bias this</p>                                                                                                                                                                                                                                                                                                                                                                                                                                                                                                                                                                                                                                                                                                                                                                                                                                                                                                                                                                                                                                                                                                                                    | <p>The authors have declared that no competing interests exist.</p>                                                                                                                                                                         |

work—acknowledging all financial support and any other relevant financial or non-financial competing interests.

This statement is **required** for submission and **will appear in the published article** if the submission is accepted. Please make sure it is accurate and that any funding sources listed in your Funding Information later in the submission form are also declared in your Financial Disclosure statement.

View published research articles from [PLOS ONE](#) for specific examples.

#### **NO authors have competing interests**

Enter: *The authors have declared that no competing interests exist.*

#### **Authors with competing interests**

Enter competing interest details beginning with this statement:

*I have read the journal's policy and the authors of this manuscript have the following competing interests: [insert competing interests here]*

\* typeset

#### **Ethics Statement**

Enter an ethics statement for this submission. This statement is required if the study involved:

- Human participants
- Human specimens or tissue
- Vertebrate animals or cephalopods
- Vertebrate embryos or tissues
- Field research

Write "N/A" if the submission does not require an ethics statement.

This work was carried out in strict compliance with ethical rules, with the approval of the Ethics Committee of the Public Health School of the Faculty of Medicine of the University of Kinshasa under the approval number ESP/CE/071/2019. All patients included in this study were informed of the risks associated with the study and gave their written informed consent to participate.

In case of poor clinical condition or in minor patients, the approval of the guardian was obtained. In addition, all data were analysed anonymously.

General guidance is provided below. Consult the [submission guidelines](#) for detailed instructions. **Make sure that all information entered here is included in the Methods section of the manuscript.**

#### Format for specific study types

##### Human Subject Research (involving human participants and/or tissue)

- Give the name of the institutional review board or ethics committee that approved the study
- Include the approval number and/or a statement indicating approval of this research
- Indicate the form of consent obtained (written/oral) or the reason that consent was not obtained (e.g. the data were analyzed anonymously)

##### Animal Research (involving vertebrate animals, embryos or tissues)

- Provide the name of the Institutional Animal Care and Use Committee (IACUC) or other relevant ethics board that reviewed the study protocol, and indicate whether they approved this research or granted a formal waiver of ethical approval
- Include an approval number if one was obtained
- If the study involved *non-human primates*, add *additional details* about animal welfare and steps taken to ameliorate suffering
- If anesthesia, euthanasia, or any kind of animal sacrifice is part of the study, include briefly which substances and/or methods were applied

##### Field Research

Include the following details if this study involves the collection of plant, animal, or other materials from a natural setting:

- Field permit number
- Name of the institution or relevant body that granted permission

#### Data Availability

Authors are required to make all data underlying the findings described fully

Yes - all data are fully available without restriction

available, without restriction, and from the time of publication. PLOS allows rare exceptions to address legal and ethical concerns. See the [PLOS Data Policy](#) and [FAQ](#) for detailed information.

A Data Availability Statement describing where the data can be found is required at submission. Your answers to this question constitute the Data Availability Statement and **will be published in the article**, if accepted.

**Important:** Stating 'data available on request from the author' is not sufficient. If your data are only available upon request, select 'No' for the first question and explain your exceptional situation in the text box.

Do the authors confirm that all data underlying the findings described in their manuscript are fully available without restriction?

**Describe where the data may be found in full sentences. If you are copying our sample text, replace any instances of XXX with the appropriate details.**

- If the data are **held or will be held in a public repository**, include URLs, accession numbers or DOIs. If this information will only be available after acceptance, indicate this by ticking the box below. For example: *All XXX files are available from the XXX database (accession number(s) XXX, XXX).*
- If the data are all contained **within the manuscript and/or Supporting Information files**, enter the following: *All relevant data are within the manuscript and its Supporting Information files.*
- If neither of these applies but you are able to provide **details of access elsewhere**, with or without limitations, please do so. For example:

*Data cannot be shared publicly because of [XXX]. Data are available from the XXX Institutional Data Access / Ethics*

All clinical and genomic data will be available in online databases after publication. Before that, they can be transferred without resistance for useful purposes.

Committee (contact via **XXX**) for researchers who meet the criteria for access to confidential data.

The data underlying the results presented in the study are available from (include the name of the third party and contact information or URL).

- This text is appropriate if the data are owned by a third party and authors do not have permission to share the data.

\* typeset

Additional data availability information:

Tick here if your circumstances are not covered by the questions above and you need the journal's help to make your data available.

1 Clinical epidemiology and high genetic diversity amongst *Cryptococcus* spp. isolates infecting people  
2 living with HIV in Kinshasa, Democratic Republic of Congo

3 Bive ZONO BIVE<sup>1, 6</sup>, Rosalie SACHELI<sup>2, 6</sup>, Hippolyte SITUAKIBANZA NANI-TUMA<sup>3</sup>, Pius  
4 KABUTUTU ZAKAYI<sup>1</sup>, Alex KA<sup>4</sup>, Marcel MBULA MAMBIMBI<sup>3</sup>, Gaultier MUENDELE<sup>5</sup>, Raphaël  
5 BOREUX<sup>6</sup>, Nicole LANDU<sup>7</sup>, Celestin NZANZU MUDOGO<sup>1</sup>, Pierre-Robert M'BUZE<sup>8</sup>, Michel  
6 MOUTSCHEN<sup>9</sup>, Wieland MEYER<sup>4, 10</sup>, Georges MVUMBI LELO<sup>1</sup>, Marie-Pierre HAYETTE<sup>2, 6</sup>

7 <sup>1</sup>Molecular Biology Service, Department of Basic Sciences, Faculty of Medicine, University of  
8 Kinshasa, Kinshasa, the Democratic Republic of Congo;

9 <sup>2</sup>National Reference Center for Mycosis, University Hospital Center of Liege, Liege, Belgium;

10 <sup>3</sup>Infectious Diseases Service, Department of Internal Medicine/Department of Tropical Medicine,  
11 Faculty of Medicine, University of Kinshasa, Kinshasa, the Democratic Republic of Congo;

12 <sup>4</sup>Molecular Mycology Research Laboratory, Centre for Infectious Diseases and Microbiology, Faculty  
13 of Medicine and Health, Sydney Medical School, Westmead Clinical School, Marie Bashir Institute for  
14 Infectious Diseases and Biosecurity, University of Sydney, Westmead Hospital-Research and Education  
15 Network, Westmead Institute for Medical Research, Sydney, Australia;

16 <sup>5</sup>Advanced HIV-Infection Management Unit, Internal Medicine Department, Centre Hospitalier Mère  
17 et Enfant de NGABA, Kinshasa, the Democratic Republic of Congo;

18 <sup>6</sup>Center for Interdisciplinary Research on Medicines, University of Liege, Liege, Belgium;

19 <sup>7</sup>Advanced HIV-Infection Management Unit, Internal Medicine Department, Centre Médical et  
20 Evangélique Révérend LUYINDU, Kinshasa, the Democratic Republic of Congo;

21 <sup>8</sup>Advanced HIV-Infection Management Unit, Internal Medicine Department, Centre Hospitalier Roi  
22 Baudouin 1<sup>er</sup>, Kinshasa, the Democratic Republic of Congo;

23 <sup>9</sup>Department of Infectious Diseases and General Internal Medicine, University Hospital Center of Liege,  
24 Liege, Belgium;

25 <sup>10</sup>Curtin Medical School, Curtin University, Perth, Australia.

26 Corresponding author: Bive ZONO BIVE, Molecular Biology Service, Department of Basic Sciences,  
27 Faculty of Medicine, University of Kinshasa, Kinshasa, the Democratic Republic of Congo; Center for  
28 Interdisciplinary Research on Medicines, University of Liege, Liege, Belgium.

29 Tel: (+243) 818682467

30 E-mail address: [bive.zono@unikin.ac.cd](mailto:bive.zono@unikin.ac.cd); ORCID ID 0000-0002-0084-5068

31

- 32 1. Rosalie SACHELI, PhD: [r.sacheli@chuliege.be](mailto:r.sacheli@chuliege.be)
- 33 2. Hippolyte SITUAKIBANZA NANI-TUMA, MD, Professor: [situakibanza.nani@unikin.ac.cd](mailto:situakibanza.nani@unikin.ac.cd)
- 34 3. Pius KABUTUTU ZAKAYI, MD, Professor: [pius.kabututu@unikin.ac.cd](mailto:pius.kabututu@unikin.ac.cd)
- 35 4. Alex KAN, PhD: [alex.kan@sydney.edu.au](mailto:alex.kan@sydney.edu.au); ORCID ID 0000-0001-9933-8340
- 36 5. Marcel MBULA MAMBIMBI, MD: [marcelmbula@gmail.com](mailto:marcelmbula@gmail.com)
- 37 6. Gaultier MUENDELE, MD: [j.gaultiermuendele@gmail.com](mailto:j.gaultiermuendele@gmail.com)
- 38 7. Raphaël BOREUX, Medical Biologist: [raphael.boreux@chuliege.be](mailto:raphael.boreux@chuliege.be)
- 39 8. Nicole LANDU, MD: [nicolelandu220@gmail.com](mailto:nicolelandu220@gmail.com)
- 40 9. Celestin NZANZU MUDOGO, MD, PhD: [celestin.mudogo@unikin.ac.cd](mailto:celestin.mudogo@unikin.ac.cd)
- 41 10. Pierre-Robert M'BUZE, MD: [docteurmbuze@gmail.com](mailto:docteurmbuze@gmail.com)
- 42 11. Michel MOUTSCHEN, MD, Professor: [mmoutschen@chuliege.be](mailto:mmoutschen@chuliege.be)
- 43 12. Wieland MEYER, Professor: [wieland.meyer@sydney.edu.au](mailto:wieland.meyer@sydney.edu.au); ORCID ID 0000-0003-3691-4077
- 44 13. Georges MVUMBI LELO, Professor: [georges.mvumbi@unikin.ac.cd](mailto:georges.mvumbi@unikin.ac.cd)
- 45 14. Marie-Pierre HAYETTE, Professor: [mphayette@chuliege.be](mailto:mphayette@chuliege.be)

46 Abstract

47 Neuromeningeal cryptococcosis (NMC) due to *Cryptococcus* spp. complex is one of the life-threatening  
 48 opportunistic infections during HIV infection, mainly in sub-Saharan Africa. We focused on the  
 49 molecular characterization of *Cryptococcus* isolates from people living with HIV (PLHIV) in Kinshasa  
 50 (DRC) and investigated possible associations between NMC severity factors and the *Cryptococcus*  
 51 *neoformans* (*Cn*) multilocus sequence typing (MLST) profiles. The isolates were characterized using  
 52 PCR serotyping, MALDI-TOF MS, internal transcribed spacer (ITS) sequencing and MLST analysis.  
 53 NMC severity factors, such as hypoglycorrhachia (<50mg/dL), very raised cerebral spinal fluid opening  
 54 pressure (>30 cm water), and pejorative outcome in patients were compared with the *Cn* MLST  
 55 sequences type (ST). Twenty-three out of 29 *Cryptococcus* isolates have been identified as serotype A  
 56 using PCR (79.3%; 95% IC: 65.5-93.1), while six (20.7%; 95% IC: 6.9-34.5) were not serotypable. The  
 57 29 isolates have been identified by ITS sequencing as follows: *Cryptococcus neoformans* (23/29,  
 58 79.3%), *Cryptococcus curvatus* (5/29, 17.2%), and *Cryptococcus laurentii* (1/29, 3.5%). All *Cn* isolates  
 59 were identified as molecular type VNI using the MLST ISHAM scheme, including seven different STs:  
 60 ST93 (n=15), ST5 (n=2), ST53 (n=1), ST31 (n=1), ST4 (n=1), ST69 (n=1), and one novel ST identified  
 61 in the present work and subsequently assigned as ST659 (n=2). Among NMC severity factors, only the  
 62 patient pejorative outcome was associated with infections by less common STs isolates ( 7/8, 87.5%,  
 63  $p=0.02$ ) (ST53, ST31, ST5, ST4, ST659, and ST69). Molecular analysis of *Cryptococcus* spp. isolates  
 64 showed a wide species diversity and genetic heterogeneity of *Cn* within the VNI molecular type.  
 65 Furthermore, infections due to less common STs were associated with more pejorative comes than  
 66 those due to ST93.



67 Keywords

68 *Cryptococcus* spp., species diversity, ITS sequencing, MALDI-TOF MS, Multilocus sequence typing,  
69 people living with HIV, neuromeningeal cryptococcosis, Kinshasa, DRC

70 INTRODUCTION

71 Among opportunistic infections encountered during HIV/AIDS, neuromeningeal cryptococcosis (NMC)  
72 is implied in 15% of deaths and 75% of which occur in sub-Saharan Africa [1]. In this region, the annual  
73 mortality from this invasive fungal infection is estimated at 504,000 per year, making it the fourth  
74 leading cause of death from infectious diseases [2].

75 Among 510,000 people living with HIV (PLHIV) in the Democratic Republic of Congo (DRC), only  
76 75% are on antiretroviral treatment (ART) and the NMC prevalence is estimated at 8.8%, with a death  
77 rate of approximately one out of three patients [3], [4].

78 Grounded on epidemiological, pathobiology, geographical distribution, ecological niches, clinical  
79 presentation, therapeutic, and genetic differences [5], the *Cryptococcus neoformans/C. gattii* species  
80 complex (*Cn/Cg*), the main etiological agents of cryptococcosis, are classified into two species, four  
81 varieties, and eight major molecular types [6]. In this manuscript, we applied the new nomenclature of  
82 the *Cryptococcus neoformans/C. gattii* species complex as proposed by Ferry Hagen *et al.* [7].

83 Apart from the *Cn/Cg* species complex, non-*neoformans/ gattii* *Cryptococcus* species which have long  
84 been considered saprophytic and non-pathogenic to humans have recently been associated with  
85 cryptococcal infections. Of these species, *C. laurentii* and *C. albidus* are identified in 80% of the cases  
86 [8]. Some *Cryptococcus* spp., such as *C. gattii* require a more intensive therapeutic approach to  
87 management than *C. neoformans*, and others, such as non-*neoformans* and non-*gattii* are known to have  
88 primary resistance to fluconazole and 5-flucytosine [9]. Hence, local epidemiological knowledge  
89 including circulating *Cryptococcus* spp. molecular types and their susceptibility profiles to usual  
90 antifungal agents would facilitate better cryptococcosis surveillance in the general population, and  
91 update patients' management based on local data.

92 As the association of *Cn/Cg* molecular type with the antifungal susceptibility profile has previously been  
93 established, it is also opportune to verify the association of molecular types (MT) or even MLST  
94 sequence types (ST) with the cryptococcosis clinical presentation. Therefore, we hypothesized that the  
95 NMC severity factors could be associated with the isolates ST in the cause of the disease [10].

96 Therefore, we describe here the NMC clinical epidemiology amongst PLHIV and the molecular  
97 characterization of *Cryptococcus* spp. isolates. In addition, the association between NMC severity  
98 factors and *Cryptococcus neoformans* MLST ST was statistically analysed.

99 MATERIALS AND METHODS

100 Study design, patients and samples

101 A cross-sectional study was conducted in three Kinshasa public hospitals supported by Doctors without  
102 Borders-Belgium (MSF), from 1 February 2019 to 29 February 2020. Thus, 278 patients were included  
103 and among them, NMC was diagnosed based on the cryptococcal antigens (CrAg) detection among  
104 patients and/or the presence of yeasts cells detected by India ink staining and/or by culture.

105 Biological analyses

106 The CrAg detection was carried out in the CSF of each included patient, using the CrAg LFA IMMY  
107 test (Immuno-mycologic, Norman, OK, USA). Direct staining with India ink in the CSF was also carried  
108 out, and the CSF was cultured on Sabouraud Dextrose Agar-Chloramphenicol medium (SDA-C,  
109 bioMérieux, France) at 30°C for 48 to 72h. The qualitative test Pandy was performed for determining  
110 proteinorachia as previously described [11].

111 Identification by MALDI-TOF MS

112 MALDI-TOF MS (Matrix-Assisted Laser Desorption Ionization Time-Of-Flight Mass Spectrometry,  
113 Bruker Daltonics GmbH, Germany) was used for the identification of all fungal strains. From the culture  
114 on SDA-C, an extended direct deposit was performed by adding 1µL of 70% formic acid to the sample  
115 on a MALDI target plate (MSP 96 BC ground steel target; Bruker Daltonics). Then, 1µL of saturated  
116 cyano-4-hydroxycinnamic acid solution (HCCA matrix; Bruker Daltonics) was added. Each  
117 microorganism tested was spotted twice on the same MALDI target plate. Measurement was performed  
118 with MALDI Flex control V3.4 (Bruker Daltonics) following the settings suggested by the manufacturer  
119 using automated collecting spectra. The spectra of each duplicated spot were compared with those in  
120 the reference library (BD 8326 or version V 9.0) [12]. The following score was considered for the  
121 identification of the fungal species: MS Score  $\geq 1.5$  and the 3 first results identical and consistent with  
122 the appearance of the colonies on agar.

123 Molecular analysis

124 DNA extraction

125 Genomic DNA was extracted from the fresh 24-hour cultures using the NucleoSpin blood quick pure  
126 kit (Macherey-Nagel, Düren, Germany). Two preliminary steps were added to the manufacturer's  
127 protocol, namely bead-beating and thermal shock. In a 2mL tube containing 0.5mm glass beads (Roche  
128 Diagnostics GmbH, Penzberg, Germany), colonies were mixed with 350µL lysis buffer (Promega  
129 Corporation, USA). The mixture was vortexed five times due to 6000 vibrations per minute for 40  
130 seconds (bead-beating). Between each pass, the tube was cooled between -20°C and 1°C for 30 seconds  
131 in a Nalgene microtube cooler container (Dutscher, France) for a thermal shock.

132 Serotyping PCR

133 A classical serotyping PCR designed for *Cn/Cg* species complex was performed according to the  
134 protocol described by Ito-Kuwa *et al.*[13].

#### 135 ITS sequencing

136 The ITS2 region of the rRNA gene cluster was amplified using the ITS86 forward primer  
137 5'GTGAATCATCGAATCTTTGAA 3' and ITS4 reverse primer 5'TCCTCCGCTTATTGATATGC 3'  
138 [14]. The amplified products were purified using the kit clean Seq Agencourt (Beckman Coulter Life  
139 Science). The sequencing was done on the automate ABI 3500/3500XL (Applied Biosystem, Life  
140 Technologies). Bidirectional sequence data were generated after purification using the BigDye  
141 terminator sequencing kit (Applied Biosystems, Life Technologies, Belgium). Sequences generated by  
142 the software ABI Sequence Scanner V.1.0 (Applied Biosystems, Life Technologies) were then  
143 compared to the CBS database by using The BioloMICS database software  
144 ([https://wi.knaw.nl/page/Pairwise\\_alignment](https://wi.knaw.nl/page/Pairwise_alignment)), which comprises several databases including Genbank.  
145 Only results that repeated the same identification at least three times and had a similarity score greater  
146 than 95% were considered valid.

#### 147 Multilocus sequence typing

148 Multilocus sequence typing (MLST) was performed using the International Society of Human and  
149 Animal Mycology (ISHAM) consensus scheme for the *Cn/Cg* species complexes; including six unlinked  
150 housekeeping loci (GPD1, LAC1, URA5, SOD1, CAP59, and PLB1) and the non-coding region IGS1  
151 [6]. After DNA extraction, samples were sequenced using Illumina HiSeq as previously described [15],  
152 and the raw contigs sequences were paired, removed of duplicate reads, and trimmed using Geneious  
153 Prime 64\_2021\_1 (<https://www.geneious.com>). Then, the MLST loci were extracted by mapping to the  
154 reference sequences of each MLST locus from the online ISHAM MLST fungal database  
155 (<https://mlst.mycologylab.org/>) and each allele type (AT) was assigned using the same online database.  
156 The ATs combination defined the sequences type (ST) which in most cases corresponds to the species  
157 Molecular type.

#### 158 Phylogenetic analysis

159 Phylogenetic analysis of concatenated sequences of the seven MLST loci was performed using MEGA  
160 v.6.06 software (<http://www.ebi.ac.uk/tools/msa/clustalo>). A dendrogram was produced by the  
161 Maximum Likelihood method using sequences alignment with the Kimura 2-parameter method. Gaps  
162 were treated as a complete deletion. Statistical support for each clade was assessed using bootstrap  
163 analysis with 1000 replicates. Apart from *C. neoformans* and *C. gattii* reference strains (WM) included  
164 in the analysis, the MLST sequences of the only *C. neoformans* strain (ZS) previously isolated from  
165 Congolese infected patient (DRC) was also included.

#### 166 Statistical analysis

167 The analysis was carried out using R-cmdr version 2.6-1 (R Foundation for Statistical Computing,  
 168 Vienna, Austria). Missing data were considered completely random and the available data were  
 169 analyzed. The continuous variables were summarised as mean  $\pm$  standard deviation and compared using  
 170 Student's t-test. The proportions and their respective 95% confidence intervals were calculated for the  
 171 categorical data. The main outcome variable was the NMC diagnosis. This variable was compared to  
 172 other variables of the same category using Pearson's chi-square test or Fisher's exact test if the expected  
 173 values were less than five. Very raised CSF opening pressure ( $>30$ cm water), hypoglycorrhachia  
 174 ( $<50$ mg/dL) and patients' pejorative outcome were considered in performing the association analysis  
 175 between the NMC severity factors and the identified ST-MLST profile. Also, two isolates categories  
 176 were formed according to the STs-MLST profile: the main ST isolated on the one hand, and the other  
 177 STs on the other hand. All tests were two-tailed and a  $p < 0.05$  was considered statistically significant.

178 It is noteworthy that comparative data between PLHIV with *Cryptococcus neoformans* versus  
 179 *Cryptococcus curvatus*/ *C. laurentii* meningitis are presented in another published paper in BMC  
 180 infectious diseases (<https://doi.org/10.1186/s12879-021-06849-3>).

#### 181 Ethical considerations

182 This work was carried out in strict compliance with ethical rules, with the approval of the Ethics  
 183 Committee of the Public Health School of the Faculty of Medicine of the University of Kinshasa under  
 184 the approval number [ESP/CE/071/2019](#). All patients included in this study were informed of the risks  
 185 associated with the study and gave their informed consent to participate. Anonymity was guaranteed  
 186 and the data collected was kept and handled by the research team alone.

#### 187 RESULTS

188 Among 278 PLHIV included, 66 (23.7%, 95% CI: 18.7 – 28.8) had NMC. However, the NMC  
 189 prevalence was almost similar in men (24.8%, 95% CI: 14.9 – 34.7, 25/101 included men patients) as  
 190 in women patients (23.2%, 95% CI: 15.7 – 30.7, 41/177 included women patients).

#### 191 Patients' characteristics

192 The demographic and clinical characteristics of the patients are presented in Table 1. The mean age of  
 193 the included patients was  $42.2 \pm 12.1$  years old. Most of them were female (63.7%), married or  
 194 cohabitating (49.3%), and had a secondary education level (55.8%). Regarding the patients' clinical  
 195 stage before NMC diagnosis, **NMC tends to develop during HIV-infection stage IV (95.5%,  $p = 0.0008$ )**.  
 196 PLHIV with NMC have **four times more probability** to present headaches (OR 3.8; IC 95%: 1.7 – 8.8;  
 197  $p=0.0001$ ), three **times more probability** to present ulsions (OR 2.7; IC 95%: 1.01-7.1,  $p=0.02$ ); and  
 198 six times more probability to present visual disturbances than no NMC patients (OR 5.6; IC 95%: 1.04-  
 199 37.5,  $p=0.02$ ). The vast majority of NMC patients had clear CSF (93.9%) and a significantly raised CSF

200 opening pressure (65.4%,  $p < 0.0001$ ). Furthermore, the pejorative outcome was not significantly  
 201 different between NMC than non-NMC patients (37.5 versus 35.4%, respectively).

202 Table 1: Demographic and clinical characteristics of patients

| Characteristics <sup>1</sup>                          | Overall data (%) <sup>2</sup> | NMC             |                 | <i>p</i> -value | Crude OR (95% CI) |
|-------------------------------------------------------|-------------------------------|-----------------|-----------------|-----------------|-------------------|
|                                                       |                               | No (%)          | Yes (%)         |                 |                   |
| Demographic characteristics                           |                               |                 |                 |                 |                   |
| Mean age $\pm$ SD (years) (n=278)                     | 42.2 $\pm$ 12.1               | 42.8 $\pm$ 12.0 | 40.2 $\pm$ 12.4 | 0.1             |                   |
| Female sex (n=278)                                    | 177 (63.67)                   | 136 (64.2)      | 42 (62.1)       | 0.7             |                   |
| Marital status (n=278)                                |                               |                 |                 | 0.6             |                   |
| Single                                                | 89 (32.01)                    | 71 (33.5)       | 18 (27.3)       |                 |                   |
| Married/cohabitating                                  | 137 (49.28)                   | 102 (48.1)      | 35 (53.0)       |                 |                   |
| Divorced/widower                                      | 52 (18.7)                     | 39 (18.4)       | 13 (19.7)       |                 |                   |
| Education level attained (n=278)                      |                               |                 |                 | 0.6             |                   |
| None/primary                                          | 69 (24.82)                    | 52 (24.5)       | 17 (25.8)       |                 |                   |
| Secondary                                             | 155 (55.76)                   | 121 (57.1)      | 34 (51.5)       |                 |                   |
| Higher education/university                           | 54 (19.42)                    | 39 (18.4)       | 15 (22.7)       |                 |                   |
| Clinical characteristics                              |                               |                 |                 |                 |                   |
| HIV clinical stage (n=242)                            |                               |                 |                 | 0.0008          | -                 |
| Stage I                                               | 1 (0.41)                      | 1 (0.5)         | 0 (0.0)         |                 |                   |
| Stage II                                              | 2 (0.83)                      | 2 (0.9)         | 0 (0.0)         |                 |                   |
| Stage III                                             | 51 (21.07)                    | 48 (22.6)       | 3 (4.5)         |                 |                   |
| Stage IV                                              | 224 (92.6)                    | 161 (75.9)      | 63 (95.5)       |                 |                   |
| Headaches (n=269)                                     | 174 (64.68)                   | 120 (58.8)      | 54 (84.4)       | 0.0001          | 3.8 (1.7-8.8)     |
| Fever ( $^{\circ}$ C) (n=269)                         | 179 (66.54)                   | 141 (68.8)      | 38 (59.4)       | 0.1             |                   |
| Weight loss (n=269)                                   | 144 (53.53)                   | 107 (52.2)      | 37 (57.8)       | 0.4             |                   |
| Consciousness disorder (n=269)                        | 100 (37.17)                   | 82 (40.0)       | 18 (28.1)       | 0.08            |                   |
| Memory impairment (n=268)                             | 74 (27.61)                    | 59 (28.9)       | 15 (23.4)       | 0.3             |                   |
| Neck stiffness (n=269)                                | 49 (18.22)                    | 33 (15.6)       | 16 (24.2)       | 0.1             |                   |
| Vomiting (n=269)                                      | 54 (20.07)                    | 42 (20.5)       | 12 (18.8)       | 0.7             |                   |
| Convulsions (n=269)                                   | 23 (8.6)                      | 13 (6.3)        | 10 (15.6)       | 0.02            | 2.7 (1.01-7.1)    |
| Vertigo (n=269)                                       | 32 (11.9)                     | 23 (11.2)       | 9 (14.1)        | 0.5             |                   |
| Brudzinski sign (n=269)                               | 15 (5.58)                     | 8 (3.8)         | 7 (10.6)        | 0.05            |                   |
| Physical asthenia (n=269)                             | 30 (11.1)                     | 23 (11.2)       | 7 (10.9)        | 0.9             |                   |
| Kernig sign (n=269)                                   | 14 (5.2)                      | 9 (4.2)         | 5 (7.6)         | 0.3             |                   |
| Visual disturbances (n=269)                           | 8 (2.97)                      | 3 (1.5)         | 5 (7.8)         | 0.02            | 5.6 (1.04-37.5)   |
| Functional Impotence (n=269)                          | 17 (6.32)                     | 12 (5.9)        | 5 (7.8)         | 0.5             |                   |
| Clear CSF appearance (n=265)                          | 249 (93.9)                    | 200 (94.3)      | 62 (93.9)       | 1               |                   |
| Very raised CSF opening pressure (cm of water) (n=92) | 65 (70.6)                     | 7 (10.6)        | 17 (65.4)       | <0.0001         | -                 |
| Antiretroviral therapy (ART) (n=278)                  | 204 (73.4)                    | 153 (72.2)      | 51 (77.3)       | 0.4             | -                 |
| Pejorative outcome <sup>3</sup> (n=217)               | 78 (35.9)                     | 57 (35.4)       | 21 (37.5)       | 0.7             | -                 |

203 <sup>1</sup>according to available data

204 <sup>2</sup>column per cent calculated for each group

205 <sup>3</sup>Death, status quo, discharge against medical advice, or transfer due to complications

206

## 207 Routine diagnostic analysis of NMC

208 Out of 66 NMC samples confirmed, 63 (95.5%, 95% CI: 89.4-100) had detectable cryptococcal antigen,  
 209 only 29 (43.3%, 95% CI: 31.8–56.1) had yeasts present after by India ink staining, and the repeated  
 210 culture was positive only in 43.3% of the cases (29/66). All three CrAg negative samples were recovered  
 211 from positive cultures.

## 212 MALDI-TOF MS, ITS sequencing, and PCR serotyping characterization

213 Of the 29 positive cultures, MALDI-TOF MS identified 23 as *C. neoformans* (79.3%), four as *C.*  
 214 *curvatus* (13.8%), and two (6.9%) could not be identified. While only 23 isolates were identified as  
 215 serotype A using serotyping PCR (79.3%), ITS sequencing identified all isolates as *C. neoformans*  
 216 79.3% (23/29), *C. curvatus* 17.2% (5/29), and *C. laurentii* 3.5% (1/29). The results of the MALDI-TOF  
 217 MS, ITS sequencing, and serotyping PCR characterization are summarized in Table 2.

218 Table 2: MALDI-TOF MS, ITS sequencing, and Multiplex PCR serotyping characterization

| Analysis                       | n=29 (%)  |
|--------------------------------|-----------|
| MALDI-TOF MS                   |           |
| <i>Cryptococcus neoformans</i> | 23 (79.3) |
| <i>Cryptococcus curvatus</i>   | 4 (13.8)  |
| Not identified                 | 2 (6.9)   |
| ITS sequencing                 |           |
| <i>Cryptococcus neoformans</i> | 23 (79.3) |
| <i>Cryptococcus curvatus</i>   | 5 (17.2)  |
| <i>Cryptococcus laurentii</i>  | 1 (3.5)   |
| Serotyping PCR                 |           |
| Serotype A                     | 23 (79.3) |
| No identifiable                | 6 (20.7)  |

219

## 220 MLST result

221 Apart from the six strains identified as *C. curvatus* or *C. laurentii*, the remaining 23 *C. neoformans*  
 222 isolates belong to the molecular type VNI. MLST analysis identified seven different STs: ST93 (15  
 223 isolates, 65.2%), ST5 (two isolates, 8.6%), ST53 (one isolate, 4.3%), ST31 (one isolate, 4.3%), ST4  
 224 (one isolate, 4.3%), ST69 (one isolate, 4.3%), and one novel ST that was not yet reported in the online  
 225 fungal MLST database and was later assigned as ST659 (two isolates, 8.6%).

## 226 Phylogenetic analysis

227 Phylogenetic analysis using maximum likelihood identified two major clusters among the studied  
 228 isolates investigated (BZ isolates in figure 1), grouping ST659, ST69, ST4, ST5, and ST93 including  
 229 21 isolates out of 23 analysed. The two remaining STs (ST31 and ST53) were slightly less correlated  
 230 with the other cluster. The single Congolese (DRC) isolate previously characterised and stored in the  
 231 MLST fungal database was deeply embedded in the first cluster (Fig1).

232 Fig1. Phylogenetic tree based on concatenated sequences of the seven MLST loci: CAP59, GPD1, IGS1,  
 233 LAC1, PLB1, SOD1, and URA5 using maximum likelihood. Numbers near the nodes represent the  
 234 bootstrap values obtained by 1000 repetitions.

235 NMC severity factors and MLST ST of *Cryptococcus neoformans* isolates

236 Among NMC severity factors described and considered in the present study, only the pejorative  
 237 therapeutic outcome was associated with infections due to the less common MLST STs isolates (ST5,  
 238 ST659, ST53, ST31, ST4, and ST69) versus the main ST (ST93) (87.5% vs. 40%, respectively;  $p=0.02$ ).  
 239 Table 3 summarizes the NMC severity factors compared to the MLST ST of the *C. neoformans* isolates.

240 Table 3: NMC severity factors compared to the MLST STs of the *C. neoformans* isolates.

| Variable                                | <i>Cryptococcus neoformans</i> ST identified                  |                                                                 | 241         |
|-----------------------------------------|---------------------------------------------------------------|-----------------------------------------------------------------|-------------|
|                                         | Main study ST <sup>1</sup><br>n <sup>3</sup> (%) <sup>4</sup> | Less common STs <sup>2</sup><br>n <sup>3</sup> (%) <sup>4</sup> | 242<br>243  |
| Glycorhachia (mg/dl) (n=10)             |                                                               |                                                                 | 244         |
| Low ( $\leq 50$ )                       | 7 (87.5)                                                      | 2 (100)                                                         | 245         |
| High ( $\geq 60$ )                      | 1 (12.5)                                                      | 0                                                               | 246         |
| Opening pressure (cm of water)<br>(n=8) |                                                               |                                                                 | 247<br>248  |
| Moderately high ( $<30$ )               | 2 (40)                                                        | 0                                                               | 249         |
| Very high ( $\geq 30$ )                 | 3 (60)                                                        | 3 (100)                                                         | 250         |
| Therapeutic outcome (n=23)              |                                                               |                                                                 | 251<br>0.02 |
| Good <sup>5</sup>                       | 9 (60)                                                        | 1 (12.5)                                                        | 252         |
| Bad <sup>6</sup>                        | 6 (40)                                                        | 7 (87.5)                                                        | 253<br>254  |

255 <sup>1</sup>ST93

256 <sup>2</sup>STs5, 659, 53, 31, 4, 69.

257 <sup>3</sup>With available data

258 <sup>4</sup>Percentage of columns calculated for each group

259 <sup>5</sup>Recovery and discharge from hospital

260 <sup>6</sup>Death, status quo, discharge against medical advice, or transfer due to complications

261

262 DISCUSSION

263 We described the clinical epidemiology of PLHIV, the routine analysis and the molecular  
264 characterization of the *Cryptococcus* spp. isolates. In addition, the association between the NMC  
265 severity factors and *Cryptococcus neoformans* MLST ST was statistically tested.

266 Neuromeningeal cryptococcosis (NMC) prevalence in people living with HIV (PLHIV) was estimated  
267 at 23.7% (95% CI: 18.7 – 28.8). This hospital prevalence is much higher than that reported in France  
268 [16], in other Africa states [17], [18], and previously in the DRC [4]. This could be explained by (a) the  
269 difference in HIV infection prevalence in various countries and regions, (b) the HIV management and  
270 the opportunistic infections prevention policy applied in each country, (c) the HIV patients focused on  
271 in each study, and (d) the sensitivity and specificity of biological analysis used for diagnostic  
272 confirmation. Reflecting the PLHIV demographic profile in the DRC, female patients aged  $42.19 \pm$   
273  $12.13$  years old, married/cohabitating and with secondary education level were non-significantly most  
274 affected. McClelland E. *et al.* found that virulent *C. neoformans* phenotypes from females had longer  
275 doubling times and released more capsular glucuronoxylomannan (GXM) in the 17- $\beta$  estradiol presence.  
276 Plus, macrophages from women phagocytized more *C. neoformans* than those from men. The men  
277 hence had a higher fungal load than women and their macrophages were more likely to be destroyed by  
278 *C. neoformans* [19]. This protective trend in women was not significantly noted in the current study.  
279 Headache, convulsions and visual disturbances were significantly associated with NMC. This data is  
280 largely consistent with the literature [20]. Slightly more than the proportion reported in this study (7.7%),  
281 visual disturbances are known to be associated with NMC in 18% of cases following raised intracranial  
282 pressure [21]. Among the clinical parameters (headache, sensorium depression, papilledema, and raised  
283 CSF opening pressure) and the radiological ones (flattening of the posterior sclera, increased CSF in the  
284 subarachnoid space around the optic nerve, optic nerve tortuosity and empty parietal saddle) defining  
285 these disorders, only headaches and raised CSF opening pressure were found in the present study [21].  
286 NMC was associated with higher raised CSF opening pressure, CD<sub>4</sub> count < 100 cells/mm<sup>3</sup> and HIV-  
287 infection stage IV. One of the most critical outcome determinants in PLHIV with NMC is the raised  
288 opening CSF pressure which is generally correlated with high CSF fungal load, morbidities and  
289 increased risk of death [22]. In agreement with the data described by Bicanic *et al.*, 63% of patients in  
290 the present study had very high opening CSF pressure [23].

291 Cryptococcal antigen detection was the main diagnostic tool for NMC in the present study (95%  
292 positivity rate out of 66 confirmed samples). Compared to other studies, culture positivity rate, and  
293 *Cryptococcus* India ink staining identification were very low in the present study [24]. For Kabanda T.  
294 *et al.*, CrAg detection has shown more sensitivity in clinical situations (100%) than culture (95.7%) and  
295 India ink (93.6%) [25]. The low positivity rate of direct microscopy and culture found in the present  
296 study could be caused by the precarious storage conditions of samples before analyses and/or probable  
297 low CSF fungal load in certain samples [26]. The ITS sequencing gave a better isolates identification  
298 (29/29). Described as the main species responsible for cryptococcosis diseases in PLHIV [27], *C.*



299 *neoformans* was identified for 73.3% of all isolates. The remaining cases were identified as *C. curvatus*  
300 (17.2%) and *C. laurentii* (3.5%). Initially considered saprophytic and non-pathogenic to humans, the  
301 non-*neoformans* and non-*gattii* *Cryptococcus* species are increasingly found in clinical infections in  
302 recent years [8]. Although the *C. neoformans* NMC clinical presentation is more severe in PLHIV than  
303 in non-*neoformans*/ non-*gattii* NMC, *C. curvatus* and *C. laurentii* have a high tendency to be fluconazole  
304 and 5-flucytosine resistant. In addition, these two latter species are more difficult to identify by routine  
305 laboratory methods than *C. neoformans* [8]. Thus, out of six non-*neoformans* and non-*gattii* isolates,  
306 only four were correctly identified by MALDI-TOF MS and confirmed by ITS sequencing. The lack of  
307 certain species reference spectra in the database provided by the mass spectrometry manufacturer  
308 (Bruker: BD 83) for identification, and genome differences between *Cryptococcus* species, could  
309 explain these results. Worldwide, serotype A isolates remains the most commonly isolated in  
310 environmental and clinical settings [28], a trend also observed in the current study.

311 The MLST analysis of *C. neoformans* isolates revealed large heterogeneity of STs within the single  
312 molecular type found in the present study (VNI), involving seven distinct STs. In line with our results,  
313 *Cryptococcus neoformans* ST93 is the most isolated in various countries (China, India, Indonesia, South  
314 Africa, Thailand, Brazil, Uganda, and Colombia), both in clinical and environmental settings. It has  
315 been associated with high mortality in Uganda [29]. In this study, ST93 was associated with a less  
316 pejorative treatment outcome than the less common STs. It hence opens up the debate on the relative  
317 virulence of each ST compared to the others. Although most of the STs had already been isolated in the  
318 DRC neighbouring countries, namely ST4 in Uganda and Tanzania, ST5, ST31, ST69, and ST93 in  
319 Uganda only, one ST (ST53) had previously been isolated only in Thailand and in no other country  
320 worldwide (<https://mlst.mycologylab.org/>). Plus, one isolate had an ST identified for the first time in the  
321 present study, subsequently assigned as ST659. The Congolese strain (ZS CN ST32) isolated 30 years  
322 earlier is closely related to the isolates of the dominant ST (ST93) identified in the current study.

323 As described by Trilles *et al.* regarding the low antifungal susceptibility of VGI isolates compared to  
324 the other molecular types tested [30], the less common STs isolates identified in the current study were  
325 associated with poor therapeutic outcomes.

## 326 CONCLUSIONS

327 A more severe epidemiological profile of NMC than previously reported from the DRC was found using  
328 a panel of diagnostic tests in symptomatic PLHIV. Apart from the species diversity identified amongst  
329 the yeasts isolated from CSF samples, including *C. neoformans*, *C. curvatus* and *C. laurentii*, the STs  
330 within the single molecular type VNI identified in the present study showed great heterogeneity,  
331 including seven different STs with one major ST (ST93) and six less common STs (ST5, ST659, ST53,  
332 ST31, ST4, and ST69). In addition, the less common STs isolates were associated with the patient

333 pejorative outcomes. More robust studies including larger sampling numbers and antifungal  
334 susceptibility of isolates could improve the understanding of the data from this study.

335

336

337

338

339

340

#### 341 AUTHOR CONTRIBUTIONS

342 Conceptualization: BZB.

343 Clinical and biological analysis: BZB, RS, RB and AK.

344 Samples and patient clinical data collection: GM, NL and PRM.

345 Data curation: BZB.

346 Funding acquisition: GML and MPH.

347 Investigation: BZB.

348 Methodology: BZB.

349 Project administration: MPH.

350 Resources: BZB and RS.

351 Supervision: MPH.

352 Validation: BZB, GM, NL, PRM, RS, RB, AK, HSN, PKZ, MMM, CNM, WM, GML and MPH.

353 Visualization: BZB.

354 Writing – original draft: BZB.

355 Writing – review & editing: HSN, PKZ, MMM, CNM, MM, WM, GML, and MPH.

#### 356 TRANSPARENCY DECLARATION

357 The authors declare no conflict of interest either in the conduct of the study or in the publication of this  
358 report.

#### 359 FUNDING

360 Académie de Recherche et d'Enseignement Supérieur (ARES-Belgium). The study sponsor had no role  
361 in study design, data collection, data analysis, data interpretation, or writing of the report.

## 362 REFERENCES

- 363 1. Rajasingham R, Smith RM, Park BJ, Jarvis JN, Govender NP, Chiller TM, et al. Global burden  
364 of disease of HIV-associated cryptococcal meningitis: an updated analysis. *Lancet Infect Dis.*  
365 2017;17(8):873–881.
- 366 2. Park BJ, Wannemuehler KA, Marston BJ, Govender N, Pappas PG, Chiller TM. Estimation of  
367 the current global burden of cryptococcal meningitis among persons living with HIV/AIDS.  
368 *Aids.* 2009;23(4):525–530.
- 369 3. UNAIDS and AIDSinfo. Country factsheets DEMOCRATIC REPUBLIC OF CONGO 2020  
370 HIV and AIDS Estimates Adults and children living with Country factsheets DRC | 2020 HIV  
371 testing and treatment cascade People living with HIV Coverage of adults and children. *Unaids.*  
372 2021;1–6.
- 373 4. Zono B, Kamangu E, Situakibanza H, Amaela E, Bepouka B, Mbula M, et al. Epidemiological,  
374 clinical and biological profile of neuromeningeal cryptococcosis among people living with HIV  
375 in Kinshasa, Democratic Republic of Congo. *Pan Afr Med J.* 2020;37(302):1–9.
- 376 5. Chen SCA, Korman TM, Slavin MA, Marriott D, Byth K, Bak N, et al. Antifungal therapy and  
377 management of complications of cryptococcosis due to *Cryptococcus gattii*. *Clin Infect Dis.*  
378 2013;57(4):543–551.
- 379 6. Meyer W, Aanensen DM, Boekhout T, Cogliati M, Diaz MR, Esposto MC, et al. Consensus  
380 multi-locus sequence typing scheme for *Cryptococcus neoformans* and *Cryptococcus gattii*  
381 *Maria*. *Med Mycol.* 2009;47(6):561–570.
- 382 7. Hagen F, Khayhan K, Theelen B, Kolecka A, Polacheck I, Sionov E, et al. Recognition of  
383 seven species in the *Cryptococcus gattii* / *Cryptococcus neoformans* species complex. *Fungal*  
384 *Genet Biol.* 2015;78:16–48.
- 385 8. Smith N, Sehring M, Chambers J, Patel P. Perspectives on non- *neoformans* cryptococcal  
386 opportunistic infections . *J Community Hosp Intern Med Perspect.* 2017;7(4):214–217.
- 387 9. Johnson LB, Bradley SF, Kauffman CA. Fungaemia due to *Cryptococcus laurentii* and a  
388 review of non-*neoformans* cryptococcaemia. *Mycoses.* 1998;41(7–8):277–280.
- 389 10. Chen C, Sy H, Lin L, Yen H, Wang S, Chen W, et al. Epidemiological characterization and  
390 prognostic factors in patients with confirmed cerebral cryptococcosis in central Taiwan. *J*  
391 *Venom Anim Toxins Incl Trop Dis.* 2015;21(12):10–13.

- 392 11. Jacobs RM, Cochrane SM, Lumsden JH, Norris AM. Relationship of cerebrospinal fluid  
393 protein concentration determined by dye-binding and urinary dipstick methodologies. *Can Vet*  
394 *J.* 1990;31(August):587–588.
- 395 12. Library MBTIVD, Library MBTIVD, Ivd MBT, Extension L, Library MBTIVD. Notes de  
396 publication. (mars 2019):1–61.
- 397 13. Ito-Kuwa S, Nakamura K, Aoki S, Vidotto V. Serotype identification of *Cryptococcus*  
398 *neoformans* by multiplex PCR. *Mycoses.* 2007;50(4):277–281.
- 399 14. Ferrer C, Colom F, Frases S, Mulet E, Abad JL, Alió JL. Detection and identification of fungal  
400 pathogens by PCR and by ITS2 and 5.8S ribosomal DNA typing in ocular infections. *J Clin*  
401 *Microbiol.* 2001;39(8):2873–2879.
- 402 15. Illumina. Nextera XT DNA Library Prep Kit. 2017.
- 403 16. Gangneux JP, Bougnoux ME, Hennequin C, Godet C, Chandenier J, Denning DW, et al.  
404 Estimation du poids épidémiologique des infections fongiques graves en France. *J Mycol Med.*  
405 2016;26(4):385–390.
- 406 17. Chadli S, Aghrouch M, Taqarort N, Malmoussi M, Ouagari Z, Moustoufi F, et al.  
407 Neuromeningeal cryptococcosis in patients infected with HIV at Agadir regional hospital,  
408 (Souss-Massa, Morocco). *J Mycol Med.* 2018;28(1):161–166.
- 409 18. Gbangba-Ngai E, Fikouma V, Mossoro-Kpinde CD, Tekpa G, Ouavene JO, Yangba Mongba  
410 DSA, et al. La cryptococcose neuroméningée au cours de l'infection à VIH à Bangui, à l'ère du  
411 traitement antirétroviral. *Bull la Soc Pathol Exot.* 2014;107(2):106–109.
- 412 19. McClelland EE, Hobbs LM, Rivera J, Casadevall A, Potts WK, Smith JM, et al. The Role of  
413 Host Gender in the Pathogenesis of *Cryptococcus neoformans* Infections. *PLoS One.*  
414 2013;8(5):1–7.
- 415 20. K. ME, R. PJ. Cryptococcosis. *Intraocular Inflamm.* 2016;30(1):179–206.
- 416 21. Kuriakose CK, Mishra AK, Vanjare HA, Raju A, Abraham OC. Visual disturbance in patients  
417 with cryptococcal meningitis: The road ahead. *J Neurosci Rural Pract.* 2017;8(1):151–152.
- 418 22. Graybill JR, Sobel J, Saag M, Van Der Horst C, Powderly W, Cloud G, et al. Diagnosis and  
419 management of increased intracranial pressure in patients with AIDS and cryptococcal  
420 meningitis. *Clin Infect Dis.* 2000;30(1):47–54.
- 421 23. Bicanic T, Brouwer AE, Meintjes G, Rebe K, Limmathurotsakur D, Chierakul W, et al.  
422 Relationship of cerebrospinal fluid pressure, fungal burden and outcome in patients with  
423 cryptococcal meningitis undergoing serial lumbar punctures. *Aids.* 2009;23(6):701–706.

- 424 24. Ngouana K, Dongtsa J, Kouanfack C. Cryptococcal meningitis in Yaoundé (Cameroon) HIV  
425 infected patients: diagnosis, frequency and *Cryptococcus neoformans* isolates susceptibility  
426 study to fluconazole. *J Mycol médicale*. 2015;25:11–16.
- 427 25. Kabanda T, Siedner MJ, Klausner JD, Muzoora C, Boulware DR. Point-of-care diagnosis and  
428 prognostication of cryptococcal meningitis with the cryptococcal antigen lateral flow assay on  
429 cerebrospinal fluid. *Clin Infect Dis*. 2014;58(1):113–116.
- 430 26. Saha DC, Xess I, Biswas A, Bhowmik DM, Padma M V. Detection of *Cryptococcus* by  
431 conventional, serological and molecular methods. *J Med Microbiol*. 2009;58(8):1098–1105.
- 432 27. Kwon-chung KJ, Fraser JA, Doering TL, Wang ZA, Janbon G, Idnurm A, et al. *gattii*, the  
433 Etiologic Agents of Cryptococcosis. *Cold Spring Harb Prespectives Med*. 2014;4:a019760.
- 434 28. Bougnoux ME, Angebault C, Leto J, Beretti JL. Identification des levures par spectrométrie de  
435 masse de type MALDI-TOF. *Rev Francoph des Lab*. 2013;2013(450):63–69.
- 436 29. Vélez N, Escandón P. Multilocus sequence typing (MLST) of clinical and environmental  
437 isolates of *cryptococcus neoformans* and *cryptococcus gattii* in six departments of Colombia  
438 reveals high genetic diversity. *Rev Soc Bras Med Trop*. 2020;53:1–8.
- 439 30. Trilles L, Meyer W, Wanke B, Guarro J, Lazéra M. Correlation of antifungal susceptibility and  
440 molecular type within the *Cryptococcus neoformans/C. gattii* species complex. *Med Mycol*.  
441 2012;50(3):328–332.

442

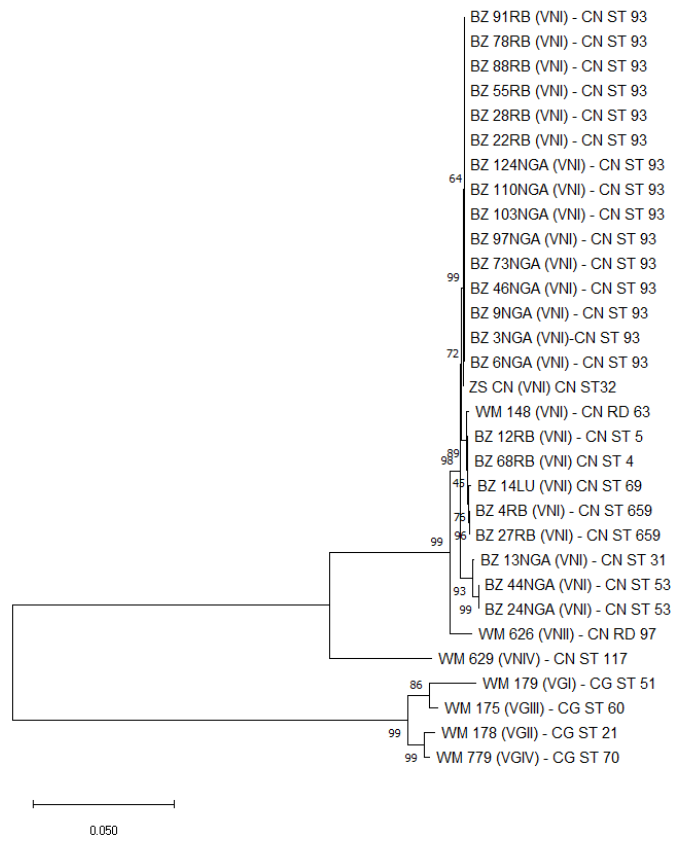

Supplement: pone.0267842.s005.pdf [file pone.0267842.s005.pdf]
